# Antimicrobial activity of Mycobacteriophage D29 Lysin B during *Mycobacterium ulcerans* infection

Alexandra G. Fraga<sup>1,2\*</sup>, Gabriela Trigo<sup>1,2,3\*</sup>, Juan Dominguez<sup>1,2</sup>, Rita Silva-Gomes<sup>1,2</sup>, Carine M. Gonçalves<sup>1,2</sup>, Hugo Oliveira<sup>3</sup>, António G. Castro<sup>1,2</sup>, Joana Azeredo<sup>3</sup> and Jorge Pedrosa<sup>1,2\*\*</sup>

<sup>1</sup> Life and Health Sciences Research Institute (ICVS), School of Health Sciences, University of Minho, Braga, Portugal;

<sup>2</sup> ICVS/3B's - PT Government Associate Laboratory, Braga/Guimarães, Portugal;

<sup>3</sup> Centre of Biological Engineering, University of Minho, Braga, Portugal

\* These authors contributed equally to this work

\*\* E-mail: [jpedrosa@med.uminho.pt](mailto:jpedrosa@med.uminho.pt)

Short Title: Lysin treatment against experimental Buruli ulcer

## ABSTRACT

Buruli Ulcer (BU) is a cutaneous disease caused by *Mycobacterium ulcerans*. The pathogenesis of this disease is closely related to the secretion of the toxin mycolactone that induces extensive destruction of the skin and soft tissues. Although the World Health Organization recommends a combination of rifampicin and streptomycin for the treatment of BU, clinical management of advanced stages often requires extensive surgical resection of the infected tissue. Therefore, it is important to develop alternative strategies for the treatment of BU.

Endolysins (lysins) are phage encoded enzymes that degrade peptidoglycan of bacterial cell walls. Over the past years, lysins have been emerging as alternative antimicrobial agents against Gram-positive bacteria. Amongst Gram-positive bacteria, mycobacteria have an unusual outer membrane that is covalently attached to the mycolylarabinogalactan-peptidoglycan complex. To overcome this additional barrier to phage-mediated lysis, some mycobacteriophages encode a lipolytic enzyme, Lysin B (Lys B).

In this study, we demonstrated for the first time that recombinant Lys B displays lytic activity against *M. ulcerans* isolates. Moreover, using a mouse model of *M. ulcerans* footpad infection, we show that subcutaneous treatment with Lys B leads to a reduction in bacterial burdens, associated with IFN- $\gamma$  and TNF production in the draining lymph node. These findings highlight the potential use of lysins as a novel therapeutic approach against this neglected tropical disease.

## AUTHOR SUMMARY

Buruli Ulcer (BU) is a necrotizing skin disease caused by *Mycobacterium ulcerans*. Standard treatment for BU lesions consists of a combination of rifampicin and streptomycin for 8 weeks. However, clinical management of advanced stages of the disease often requires extensive surgical resection of the infected tissue. Therefore, it is important to develop alternative strategies for the treatment of BU. In that sense, we tested the efficacy of Lysin B (Lys B), a phage encoded lipolytic enzyme that degrades the mycolylarabinogalactan-peptidoglycan complex present in the mycobacterial cell wall. In this study, we show that Lys B not only displays lytic activity against *M. ulcerans* isolates *in vitro*, but also leads to a reduction in bacterial burdens in *M. ulcerans*-infected mouse footpads. These findings highlight the potential use of lysins as a novel therapeutic approach against this neglected tropical disease.

## INTRODUCTION

Buruli ulcer (BU) is a necrotic cutaneous disease caused by *Mycobacterium ulcerans* and represents the third most prevalent mycobacterial infection worldwide, after tuberculosis and leprosy [1-3].

BU's pathogenesis is closely related to the secretion of the heat-stable polyketide toxin mycolactone that presents cytotoxic and immunosuppressive properties [4-8]. Early presentations of active BU include a painless pre-ulcerative nodule, papule, plaque or edematous lesion, which can evolve into typical ulcers or, in the most extreme cases, may result in extensive skin destruction, multifocal lesions or bone involvement [1,3,7,9,10].

The antibiotic regimen recommended by the World Health Organization (WHO) (daily administration of rifampicin (RIF) and streptomycin (STR) for 8 weeks) was proven to be curative for small pre-ulcerative lesions, but not for advanced forms, often requiring extensive surgical intervention [11-13]. Additionally, antibiotherapy is associated with adverse side effects, especially ototoxic and nephrotoxic effects [11,14].

Our group has previously demonstrated that bacteriophage therapy has potential as an innovative and effective therapy against *M. ulcerans* infection [15]. Indeed, our results in the murine model show that treatment with mycobacteriophage D29 effectively decreases the proliferation of *M. ulcerans* in the subcutaneous tissue resulting in marked macroscopic improvement of skin lesions [15].

Endolysins (lysins) are phage encoded enzymes produced during the late phase of the bacteriophage infection cycle, so as to degrade the cell wall peptidoglycan of the bacterial host, enabling the release of viral progeny [16-18]. Over the past decade, the development, characterization and exogenous application of recombinant and purified bacteriophage lytic enzymes has been successfully evaluated in several animal models of human diseases, such as sepsis, endocarditis, pharyngitis, pneumonia, meningitis and mucosal and skin infection [19-27]. Moreover, the use of a commercial endolysin for the treatment of *Staphylococcus aureus* skin infections has already been approved [28].

Amongst Gram-positive bacteria, mycobacteria have an unusual outer membrane composed by mycolic acids esterified with arabinogalactan (AG) which is linked to peptidoglycan, forming the mycolylarabinogalactan-peptidoglycan (mAGP) complex, a potential barrier to phage-

mediated lysis [29]. Mycobacteriophage genome sequences show that, in addition to lysins that degrade the peptidoglycan layer of bacterial cell walls [30-32], some mycobacteriophages also encode a second lysin that targets the mAGP complex, known as Lysin B (Lys B) [33-35]. As described by Payne *et al.* [33], mycobacteriophage D29 encodes Lys B, a mycolylarabinogalactan esterase that cleaves the ester linkage joining the mycolic acid-rich outer membrane to AG, releasing free mycolic acids [36]. Although few studies have shown that Lys B can also act externally, suggesting its promising antimicrobial effect, there is no proven efficacy *in vivo* [37].

In the present study, following the *in vitro* evaluation of the lytic activity of recombinant mycobacteriophage D29 Lys B against *M. ulcerans* isolates, the therapeutic effect of Lys B during *M. ulcerans* infection was evaluated in the mouse footpad model of infection. The progression of macroscopic/microscopic pathology and bacterial loads, as well as the cytokine profiles, were evaluated in the footpad and the draining lymph node (DLN).

## MATERIALS AND METHODS

### Expression and purification of Lys B

The mycobacteriophage D29 Lys B gene (GenBank: accession number AF022214) was amplified by PCR from of mycobacteriophage D29 DNA using the primer: 5'-CCCTGGAACATATGAGCAAGCCC-3' (nt 6606 to 7370). The amplification product was cloned into the expression vector pET28a (Novagem) fused to an N-terminal 6xHis tag. The resulting plasmid pET28a-Lys B was used to overexpress Lys B using *E. coli* BL21 (DE3) (Novagem) as a host for expression. Expression cultures were grown to an optical density (OD) between 0.4 and 0.6, at 600 nm, in Luria-Bertani broth containing kanamycin (50 µg/mL). Protein expression was induced with 1mM isopropyl-D-thiogalactopyranoside (IPTG) with shaking for 4 h at 37°C. Bacterial cells were harvested by centrifugation (10000x g, 5 min, 4°C), resuspended in phosphate buffer (50 mM NaH<sub>2</sub>PO<sub>4</sub>, 300 mM NaCl, 10 mM imidazole, pH 8), sonicated on ice for 5x10 s pulses separated by 10 s rests and then centrifuged (10000x g, 5 min, 4°C). The supernatant was applied to a nickel-nitrilotriacetic acid (Ni-NTA) agarose column (Qiagen) and the protein was eluted under native conditions with 500mM imidazole in phosphate buffer according to the manufacturer's instructions. The purity of the protein was analyzed by 12% sodium dodecyl sulfate-polyacrylamide gel electrophoresis (SDS-PAGE) followed by Coomassie blue staining. Protein-containing fractions were combined and filter sterilized (0.22 µm pore size) for use in *in vitro* and *in vivo* studies. Protein concentration was determined using NanoDrop ND-1000 (NanoDrop Technologies). The lipolytic activity of the purified Lys B was confirmed by spotted in Middlebrook 7H9 plates containing substrates as follows: 1% (v/v) Tween 80 or 1% (v/v) Tween 20 with 1 mM CaCl<sub>2</sub> and plates were incubated at 37°C for at least 24 h. Enzymatic activity was indicated by the formation of a white precipitate spot on Tween plates [34,38].

### *In vitro* Lys B activity against *M. ulcerans*

In order to evaluate the antimicrobial activity of purified Lys B against *M. ulcerans* strains, a plate lysis assay was performed [39]. Representative isolates of *M. ulcerans* from endemic BU areas were selected based on their genetic and phenotypic characteristics, including the type of mycolactone produced and their virulence for mice (see Table 1) [8,40-44]. The strains were obtained from the collection of the Institute of Tropical Medicine (ITM), Antwerp, Belgium.

Clinical isolates were grown on Middlebrook 7H9 broth medium at 32°C to an OD<sub>600</sub> of 1.0 and clumps were dispersed by passing the bacterial suspension several times through a 25-gauge needle. The bacterial suspension (10<sup>5</sup> CFU/mL) was plated on Middlebrook 7H9 agar medium. A stock solution of purified Lys B was serially diluted in phosphate buffer (final concentration 10-0.1 µg) and spotted onto bacterial lawns that air dried for 30 min. Phosphate buffer was spotted as a negative control. Plates were incubated at 32°C for approximately 6-8 weeks. Antimicrobial activity of Lys B was indicated by a clear lysis zone within the lawn where *M. ulcerans* growth was prevented.

### ***In vivo* bioavailability and enzymatic activity of Lys B**

The bioavailability and lipolytic enzymatic activity of Lys B were evaluated *in vivo*. Mice sera were collected by retro-orbital bleeding. Footpad and DLN suspensions were centrifuged for 10 min at 5000 rpm, and supernatant was considered the total protein extract. Protein concentration was determined using a NanoDrop ND-1000. The enzymatic activity of Lys B in samples was assessed by a lipase assay, as described above. For the bioavailability evaluation of the protein in samples, a western blot was performed. Briefly, samples were loaded and resolved by a 12% SDS-PAGE and transferred to 0.2 µm Nitrocellulose membranes (Bio-Rad) with the semi-dry Trans-Blot Turbo system (Bio-Rad). Membranes were blocked and subjected to immunoblotting with anti-mouse 6xHis antibody peroxidase conjugate (Clontech Lab. Inc., Takara). The 6xHis-tagged Lys B was detected with SuperSignal (Thermo Scientific #34095) in a Universal Hood II (Bio-Rad).

### **Animals**

Eight-week-old female BALB/c mice were obtained from Charles River (Barcelona, Spain) and were housed under biosafety level 3 conditions with food and water *ad libitum*.

### **Footpad mouse model of *M. ulcerans* infection**

*M. ulcerans* 98-912 is a mycolactone D producing strain, isolated in China from an ulcerative case and is highly virulent for mice, as previously described [8,42,43,45]. The isolate was grown on Middlebrook 7H9 agar medium at 32°C for approximately 6-8 weeks. For the preparation of inoculum, *M. ulcerans* was recovered, diluted in phosphate-buffered saline (PBS)

and vortexed using glass beads. Mice were infected in the left hind footpad with 0.03 ml of *M. ulcerans* suspension containing 5.5 log<sub>10</sub> CFU.

# **Treatment of *M. ulcerans*-infected mice with Lys B**

The treatment was initiated when footpads of mice were swollen to 2.7 mm and was performed by two subcutaneous (s.c.) injections in the infected footpad with 50 µg of Lys B in PBS at 10- and 13-days post-infection. Control-infected mice were injected with PBS without protein. Two groups of uninfected animals were also injected with Lys B or vehicle PBS buffer alone, as controls.

# **Assessment of footpad swelling**

After infection, as an index of lesion development, footpad swelling of mice was monitored throughout the experiment, using a caliper to measure the diameter of the frontal area of the footpad. For ethical reasons, mice were sacrificed after the emergence of ulceration and no further parameters were evaluated.

# **Bacterial growth**

*M. ulcerans* growth was evaluated in footpad tissues. Briefly, footpad tissue specimens were minced, resuspended in PBS (Sigma) and vortexed with glass beads to obtain homogenized suspensions. Serial dilutions of the footpad were plated on Middlebrook 7H9 agar medium. *M. ulcerans* numbers were counted after 6 to 8 weeks of incubation at 32°C and expressed as colony forming units (CFU).

# **Detection of cytokines**

The levels of the cytokines tumor necrosis factor (TNF) and gamma interferon (IFN-γ) in the supernatant of homogenized suspensions from DLN of mice were quantified by using a Quantikine Murine ELISA kit (eBioscience Inc), according to the manufacturer's instructions.

# **Detection of antibodies**



The levels of antibodies against Lys B in the sera of mice were quantified by ELISA. Mice sera were collected by retro-orbital bleeding 3 days after the second s.c. Lys B injection. Briefly, polystyrene microtitre plates (Nunc) were coated with Lys B (10 µg/ml) and incubated overnight at 4°C. The wells were blocked with 0.05% (v/v) Tween 20 in PBS for 1 h at room temperature. Serial dilutions of samples were plated and incubated for 2 h at room temperature. After washing, bound antibodies were detected with anti-mouse IgG antibody peroxidase conjugate (Sigma) for 1 h at room temperature. The antibodies against Lys B were detected with TMB substrate solution (eBioscience) at 450 nm. ELISA antibody titres were expressed as the reciprocal of the highest dilution giving an absorbance above that of the control (no Lys B injection).

# **Ethics Statement**

This study was approved by the Portuguese national authority for animal experimentation *Direção Geral de Alimentação e Veterinária* (DGAV 8421 from 2018). Animals were kept and handled in accordance with the Directive 2010/63/EU of the European Parliament and of the Council, on the protection of animals used for scientific purposes (transposed to Portuguese law – *Decreto-Lei* 2013/113, 7th of august).

# **Statistical analysis**

Differences between the means of experimental groups were analyzed with the two-tailed Student t test. Differences with a P value of  $\leq 0.05$  were considered significant.

## RESULTS

### Lys B shows *in vitro* antimicrobial activity against *M. ulcerans* isolates

Mycobacteriophage D29 Lys B was expressed and purified as a His<sub>6</sub>-tagged protein and its lipolytic activity was tested using Middlebrook 7H9 agar plates containing Tween 80 (Figure 1A) and Tween 20 (Figure 1B) as substrates [34]. Tween 80 and Tween 20 are esters of oleic (C18) and lauric (C12) acids, respectively, and can be cleaved by lipolytic enzymes to produce fatty acids and alcohol. The presence of Ca<sup>2+</sup> in the medium causes the formation of an insoluble fatty acid salt that presents itself as a white precipitate [34,39]. As observed in Figure 1A-B, Lys B produced a spot of white precipitate, confirming the enzymatic lipolytic activity of purified recombinant mycobacteriophage D29 Lys B. No activity was observed with the phosphate buffer used as a negative control (data not shown).

Purified Lys B was tested for its antimicrobial activity against several *M. ulcerans* isolates (Table 1) in a plate lysis assay. Our results show that Lys B has antimicrobial activity against *M. ulcerans*. Indeed, all *M. ulcerans* isolates tested were susceptible to the action of 10 to 0.1 µg of Lys B protein, causing a clear spot zone indicating cell lysis in *M. ulcerans* lawns. Moreover, only two of the tested *M. ulcerans* isolates, 97-1116 and 94-1331, were not susceptible to the lowest protein concentration used, 0.1 µg.

### Lys B is detected and has enzymatic activity *in vivo*

To determine the bioavailability and presence of enzymatically active Lys B *in vivo* after s.c injection in the footpad, the protein was measured in footpads, DLN, and sera. In a western blot analysis of footpad supernatant, Lys B was consistently detected, and the levels remained stable during the first 4h after administration (Figure 2A). At 6 h after injection, Lys B was still detected, although at lower levels (Figure 2A). In order to analyze if Lys B maintained its lipolytic enzymatic activity *in vivo*, samples were spotted on Tween plates [34,39]. As shown in Figure 2B, lipolytic activity was detected in footpad suspensions until 8h after injection. Regarding sera samples, although Lys B was not detected by western blot analysis (data not shown), lipolytic activity was observed (Figure 2B). No lipolytic activity or presence of Lys B was detected in the DLN (data not shown).

## **Treatment with Lys B decreases the *M. ulcerans* bacterial load in the footpad**

To investigate the efficacy of Lys B treatment for the control of *M. ulcerans* *in vivo*, we used the footpad mouse model of infection [15,42-44]. Mice were s.c. infected in footpads with  $5.5 \log_{10}$  CFU of *M. ulcerans* strain 98-912. After 10 days, when footpad swelling reached 2.7 mm (Figure 3A), and at 13 days post-infection, mice were treated subcutaneously in the footpad with 50  $\mu$ g of Lys B in PBS buffer. As shown in Figure 3B, *M. ulcerans* proliferated in infected footpads of non-treated mice over the course of experimental infection ( $P < 0.01$ ), while a significant  $1 \log_{10}$  reduction in CFU counts ( $P < 0.01$ ) was observed in Lys B treated-mice at day 16 post-infection. The administration of vehicle PBS buffer or Lys B alone in uninfected footpads did not induce significant swelling of the footpad (data not shown). Moreover, our results show (Table 2) detectable levels of IgG antibodies to Lys B in sera of both Lys B-treated infected and non-infected mice at day 16 post-infection. Collectively, these results show that the administration of Lys B to *M. ulcerans* infected tissue has a protective effect, significantly reducing local bacterial burdens despite the presence of Lys B-specific antibodies in circulation.

## **Treatment with Lys B induces increased levels of IFN- $\gamma$ and TNF in the DLN**

Previous studies from our laboratory showed that *M. ulcerans* disseminates to the DLN, where the differentiation/expansion of mycobacteria-specific T cells occurs, contributing for the control of *M. ulcerans* proliferation through the production of IFN- $\gamma$  [43,45] and TNF [8]. To determine whether Lys B treatment impacts host immune response, we carried out a comparative analysis of cytokine kinetics in the DLN.

Treatment with Lys B resulted in a significant increase in the levels of IFN- $\gamma$  in the DLN ( $P < 0.01$ ) at day 16 post-infection (six days after the beginning of the treatment), as compared with non-treated mice (Figure 4A). The protein levels of the pro-inflammatory cytokine TNF were low in the DLN of non-treated mice (Figure 4B). In contrast, in Lys B-treated mice, significant levels of TNF ( $P < 0.01$ ) were detectable at day 16 post-infection (day 6 post-treatment) (Figure 4B).

## DISCUSSION

The RIF/STR regimen recommended by the WHO for the treatment of BU is often not effective in advanced ulcerative stages of the disease, for which the adjunction of surgical resection of infected skin followed by skin grafting is required [12,13]. Regarding the development of new and innovative anti-microbial strategies, we have previously shown in the mouse footpad model of *M. ulcerans* infection that a single s.c. injection of the lytic mycobacteriophage D29 can effectively decrease the proliferation of *M. ulcerans* resulting in marked macroscopic improvement of skin lesions [15]. Importantly, these results uncovered a second line of investigation. The potential of purified recombinant bacteriophage lytic enzymes (lysins) has been regarded as an alternative method to control bacterial pathogens, including *S. aureus* [23,24,39,46,47], *Streptococcus pneumoniae* [19,20,22,25,26], group B streptococci [24], *Bacillus anthracis* [48]. Recently, a new engineered endolysin (Artilysin Art-175) has shown activity against gram-negative pathogens, such as *Pseudomonas aeruginosa* [49]. In addition, endolysins have advantageous characteristics that avoid most of the common resistance mechanisms against antibiotics [48]. Although the ability of exogenously applied lysins as antibacterial agents is typically limited to bacteria without an outer membrane or surface lipids and waxes (i.e. Gram-positive bacteria), the mycobacteriophage Lys B has the potential to reduce cell viability due to the mechanical weakening and increased permeability of the cell wall. Lys B is a mycolylarabinogalactan esterase with activity in the mAGP, hydrolyzing the ester linkage that joins the mycolic acid-rich outer membrane to arabinogalactan, releasing free mycolic acids [33]. Due to the importance of the mAGP-complex for the stability of the mycobacterial cell envelope [50], we were prompted to test the therapeutic potential of Lys B in the context of *M. ulcerans* infection.

Herein, we have demonstrated the potential of mycobacteriophage D29 Lys B therapy against *M. ulcerans* infection in the mouse footpad model. Indeed, we show that treatment with Lys B can effectively decrease the proliferation of the high virulent mycolactone-producing *M. ulcerans* strain 98-912. Importantly, our *in vitro* results show a high susceptibility of several *M. ulcerans* isolates to Lys B, indicating that its activity *in vivo* is not limited to *M. ulcerans* 98-912. The therapeutic efficacy of Lys B treatment will depend on the presence of biologically active Lys B *in vivo*. As previously described, a rapid decrease in lysin levels after administration can result

in the decrease of the amount of active lysin [22,51]. Indeed, in a pneumococcal meningitis mouse model, the bacterial load in the cerebrospinal fluid increased as the concentration of Cpl-1 lysin decreased over time [22]. Based on these observations, and in order to improve the Lys B bioavailability in mice footpads, we performed two administrations and shown detectable levels of Lys B protein with enzymatic activity in mouse footpads after s.c. injection.

It is known that the differentiation/proliferation of IFN- $\gamma$  producing mycobacteria-specific lymphocytes occurs in mouse DLN early after experimental *M. ulcerans* infection [43]. However, this transient protective host response is not sufficient to inhibit the proliferation of virulent *M. ulcerans* in mice, as increasing concentrations of mycolactone at the infection site impair the effector activity of macrophages and induce cell and tissue destruction [8,42,45]. In our study, Lys B administration effectively decreased the bacterial load in the infected tissue, allowing the development of a protective host immune response. Indeed, we observed that Lys B treatment in infected mice results in a significant increase in IFN- $\gamma$  levels in the DLN.

Regarding antibody production, it has been demonstrated in several studies using different lysins and pathogens (*S. pneumoniae*, *S. aureus*, *Streptococcus pyogenes* and *B. anthracis*) [52] that antibodies against lysins are non-neutralizing and therefore lysins can be used repeatedly to treat bacterial infections without adverse effects or loss of efficacy. In fact, when naïve and lysin-immunized mice were challenged with *S. pneumonia* and afterwards treated with Cpl-1 lysin, no differences were observed between the groups of mice regarding reduction of bacterial numbers [51]. Indeed, in the present study the presence of IgG antibodies against Lys B did not affect the control of viable bacteria in treated footpads, suggesting that produced antibodies did not inhibit Lys B activity.

For therapeutic use, an antimicrobial agent should not affect mammalian cells and only targeting the pathogen. Lysins target structures unique and highly conserved to bacterial cells and as such should not present a potential toxic threat to humans and animals [53]. This has been supported by several reports using lysins in preclinical studies in mouse models [26,51,54] and, in agreement, in our study, since Lys B injection was not associated with detectable side effects until the end of the experimental period.

To our knowledge, this is the first study on mycobacteriophage Lys B activity against *M. ulcerans* infection. It should be pointed out that mice were treated at an advanced stage of *M.*

*ulcerans* infection, which is relevant for human infection since BU patients often seek medical treatment in advanced stages of the disease.

Although the development of a therapeutic regimen using Lys B will involve the determination of the proper doses and dosing schedules, our *in vivo* results are proof of concept of their potential against BU disease.

## **Acknowledgments**

We would like to thank the ICVS-Animal Facility for technical assistance with colony management and animal welfare. We would also like to acknowledge Leon Kluskens for technical assistance with cloning, expression and purification of Lys B.

## TABLES AND FIGURES

**Table 1.** Antimicrobial activity of Lys B against *M. ulcerans* isolates.

| <i>M. ulcerans</i> strain | Origin         | Geographical origin | Type of Mycolactone | Min. Lysin B (µg) * |
|---------------------------|----------------|---------------------|---------------------|---------------------|
| 98-912                    | Ulcer          | China               | D                   | > 0.1               |
| 97-1116                   | Plaque         | Benin               | A/B                 | > 0.5               |
| 1615                      | Ulcer          | Malaysia            | A/B                 | > 0.1               |
| 94-1331                   | nd             | Papua New Guinea    | A/B                 | > 0.5               |
| 94-1327                   | Ulcer          | Australia           | C                   | > 0.1               |
| 5114                      | Ulcer          | Mexico              | -                   | > 0.1               |
| 00-1441                   | Aquatic insect | Benin               | A/B                 | > 0.1               |
| 94-1324                   | Ulcer          | Australia           | C                   | > 0.1               |

\* Minimum amount of Lys B causing a lysis zone in *M. ulcerans* lawns. The results are representative of three independent assays.

**Table 2.** Antibodies titers against Lys B

| Challenge <sup>a</sup>     | Antibody titres <sup>b, c</sup> |
|----------------------------|---------------------------------|
| <i>M. ulcerans</i>         | ND                              |
| <i>M. ulcerans</i> + Lys B | 1166 ± 196                      |
| Lys B                      | 1041 ± 165                      |
| PBS                        | ND                              |

<sup>a</sup> Mice were injected subcutaneously in the left footpad with: *M. ulcerans* 98-912, Lys B or phosphate buffer. After the emergence of macroscopic lesion (10 days post-infection; footpad swelling of 2.7mm) infected mice were subjected to treatment with two doses of subcutaneous injection of Lys B (10 and 13 days post-infection).

<sup>b</sup> Results are from one representative experiment of two independent experiments; values represent the mean ± SD (n=6)

<sup>c</sup> ELISA IgG antibody titres are expressed as the reciprocal of the highest dilution giving an absorbance above that of the control (no Lys B injection).

ND, not detected



# **Figure 1**

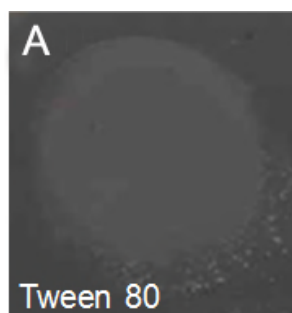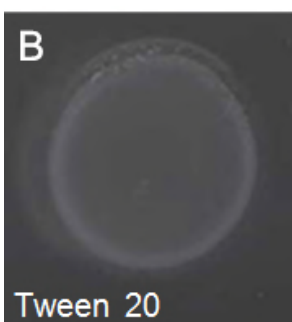

**Figure 1. Lipolytic activity of Lys B.** The lipolytic activity of the purified Lys B was confirmed by spotted in Middlebrook 7H9 plates containing substrates of **(A)** 1% (v/v) Tween 80 or **(B)** 1% (v/v) Tween 20 with 1 mM CaCl<sub>2</sub>. Plates were incubated at 37°C for at least 24 h. Enzymatic activity is indicated by the formation of a white precipitate spot on Tween plates

## Figure 2

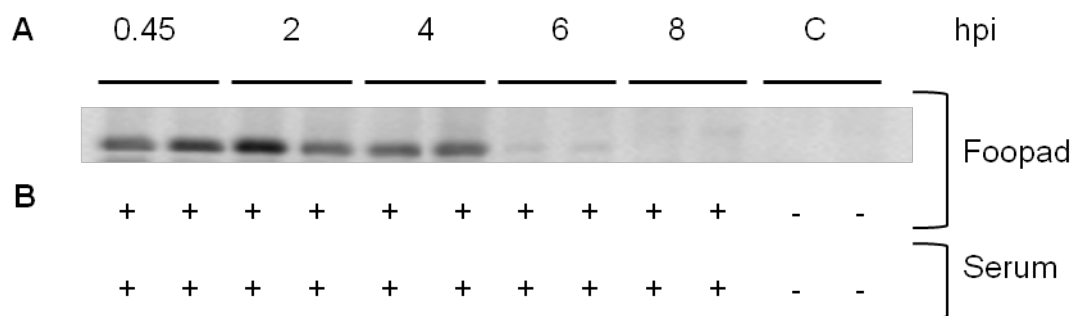

**Figure 2. Assessment of bioavailability and enzymatic activity of Lys B in the footpad and serum of mice.** Mice were injected subcutaneously in the left footpad with Lys B. At different time points, the presence of Lys B was assessed by Western blot (**A**) and Lys B enzymatic activity was determined by a lipase assay (**B**), in footpad supernatant and serum; hpi, hours post-injection; C, control mice; + lipase activity; - no activity. Results are from one representative experiment of two independent experiments.

**Figure 3**

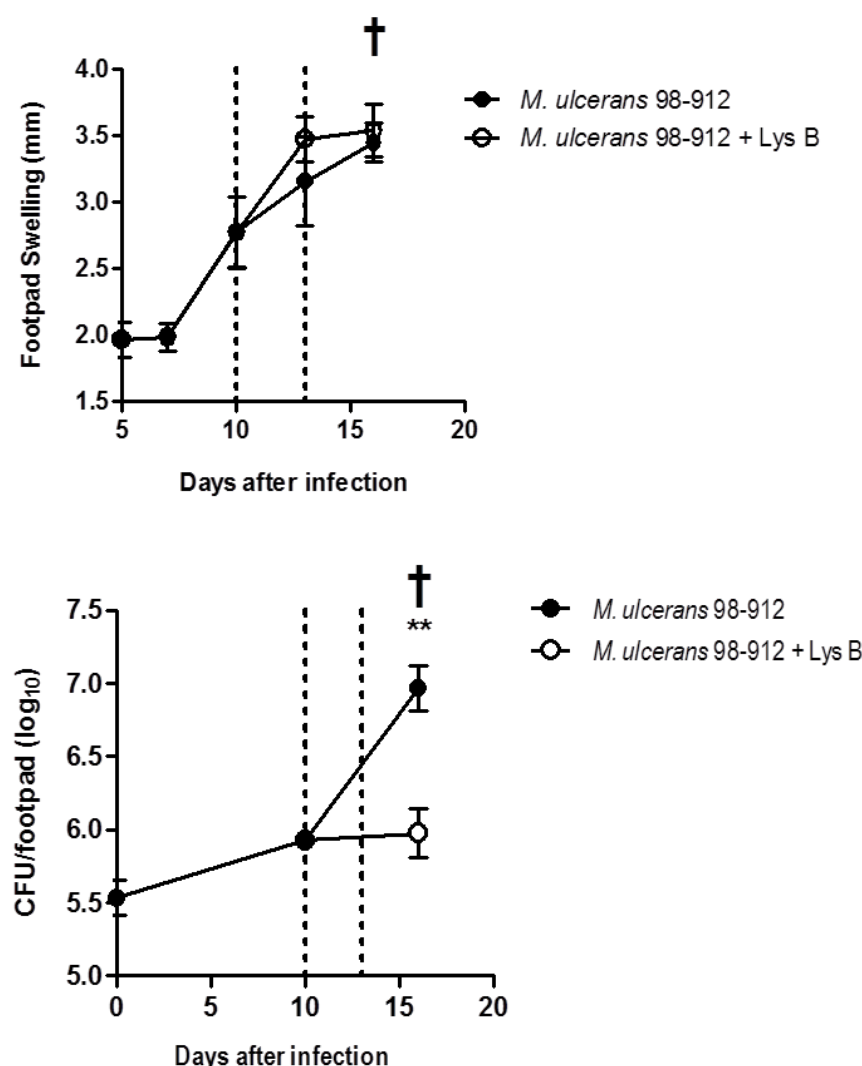

**Figure 3. Lesion progression and *M. ulcerans* proliferation in footpads of infected mice.**

Mice were infected subcutaneously in the left footpad with 5.5 log<sub>10</sub> CFU of *M. ulcerans* strain 98-912. After the emergence of macroscopic lesion (footpad swelling of 2.7mm) mice were subjected to treatment with two doses of subcutaneous injection of Lys B (10 and 13 days post-infection) (dashed lines). **(A)** Lesion progression was assessed by measurement of footpad swelling (n=15) and **(B)** bacterial proliferation was assessed by colony forming units in footpads (n=6). †, mice were sacrificed for ethical reasons after the emergence of ulceration. Results are from one representative experiment of two independent experiments. Data points represent the mean ± SD. Significant differences between treated and non-treated mice were performed using Student's t test (\*\*, p≤0.01).

**Figure 4.**

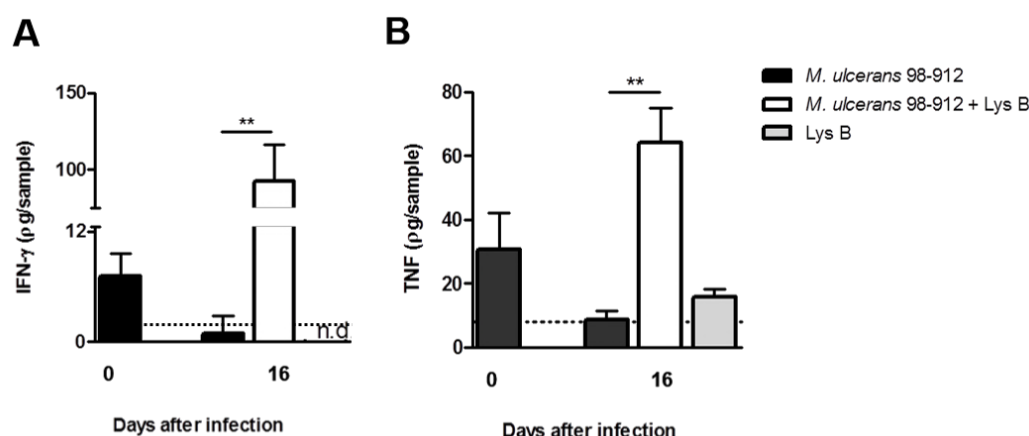

**Figure 4. Cytokine profile in DLN of Lys B-treated *M. ulcerans* infected mice.** Mice were infected subcutaneously in the left footpad with 5.5 log<sub>10</sub> CFU of *M. ulcerans* strain 98-912. After the emergence of macroscopic lesion (footpad swelling of 2.7mm) mice were subjected to treatment with two doses of subcutaneous injection of Lys B (10 and 13 days post-infection). **(A)** Levels of IFN-γ and **(B)** TNF in DLN were quantified by ELISA. Results are from one representative experiment of two independent experiments. Bars represent the mean ± SD (n=6). n.d., not detected. Dashed lines represent the detection limit. Significant differences between treated and non-treated mice were performed using Student's t test (\*\*, p≤0.01).

## REFERENCES

1. Sizaïre V, Nackers F, Comte E, Portaels F (2006) *Mycobacterium ulcerans* infection: control, diagnosis, and treatment. *Lancet Infect Dis* 6: 288-296.
2. Portaels F, Silva MT, Meyers WM (2009) Buruli ulcer. *Clin Dermatol* 27: 291-305.
3. Wansbrough-Jones M, Phillips R (2006) Buruli ulcer: emerging from obscurity. *Lancet* 367: 1849-1858.
4. George KM, Chatterjee D, Gunawardana G, Welty D, Hayman J, et al. (1999) Mycolactone: a polyketide toxin from *Mycobacterium ulcerans* required for virulence. *Science* 283: 854-857.
5. George KM, Pascopella L, Welty DM, Small PL (2000) A *Mycobacterium ulcerans* toxin, mycolactone, causes apoptosis in guinea pig ulcers and tissue culture cells. *Infect Immun* 68: 877-883.
6. Hong H, Spencer JB, Porter JL, Leadlay PF, Stinear T (2005) A novel mycolactone from a clinical isolate of *Mycobacterium ulcerans* provides evidence for additional toxin heterogeneity as a result of specific changes in the modular polyketide synthase. *Chembiochem* 6: 643-648.
7. Guarner J (2018) Buruli Ulcer: Review of a Neglected Skin Mycobacterial Disease. *J Clin Microbiol* 56.
8. Torrado E, Adusumilli S, Fraga AG, Small PL, Castro AG, et al. (2007) Mycolactone-mediated inhibition of tumor necrosis factor production by macrophages infected with *Mycobacterium ulcerans* has implications for the control of infection. *Infect Immun* 75: 3979-3988.
9. Huygen K, Adjei O, Affolabi D, Bretzel G, Demangel C, et al. (2009) Buruli ulcer disease: prospects for a vaccine. *Med Microbiol Immunol* 198: 69-77.

- 411 10. Chany AC, Tresse C, Casarotto V, Blanchard N (2013) History, biology and chemistry of  
412 *Mycobacterium ulcerans* infections (Buruli ulcer disease). Nat Prod Rep 30: 1527-1567.
- 413 11. World Health Organization (2004) Provisional guidance on the role of specific antibiotics in  
414 the management of *Mycobacterium ulcerans* disease (Buruli ulcer)  
415 WHO/CDS/CPE/GBUI/2004.10.
- 416 12. Chauty A, Ardant MF, Adeye A, Euverte H, Guedenon A, et al. (2007) Promising clinical  
417 efficacy of streptomycin-rifampin combination for treatment of buruli ulcer  
418 (*Mycobacterium ulcerans* disease). Antimicrob Agents Chemother 51: 4029-4035.
- 419 13. Kibadi K, Boelaert M, Fraga AG, Kayinua M, Longatto-Filho A, et al. (2010) Response to  
420 treatment in a prospective cohort of patients with large ulcerated lesions suspected to be  
421 Buruli Ulcer (*Mycobacterium ulcerans* disease). PLoS Negl Trop Dis 4: e736.
- 422 14. Yotsu RR, Suzuki K, Simmonds RE, Bedimo R, Ablordey A, et al. (2018) Buruli Ulcer: a  
423 Review of the Current Knowledge. Curr Trop Med Rep 5: 247-256.
- 424 15. Trigo G, Martins TG, Fraga AG, Longatto-Filho A, Castro AG, et al. (2013) Phage therapy is  
425 effective against infection by *Mycobacterium ulcerans* in a murine footpad model. PLoS  
426 Negl Trop Dis 7: e2183.
- 427 16. Fischetti VA (2010) Bacteriophage endolysins: a novel anti-infective to control Gram-positive  
428 pathogens. Int J Med Microbiol 300: 357-362.
- 429 17. Pastagia M, Schuch R, Fischetti VA, Huang DB (2013) Lysins: the arrival of pathogen-directed  
430 anti-infectives. J Med Microbiol 62: 1506-1516.
- 431 18. Gigante AM, Hampton CM, Dillard RS, Gil F, Catalao MJ, et al. (2017) The Ms6 Mycolyl-  
432 Arabinogalactan Esterase LysB is Essential for an Efficient Mycobacteriophage-Induced  
433 Lysis. Viruses 9.
- 434 19. Loeffler JM, Nelson D, Fischetti VA (2001) Rapid killing of *Streptococcus pneumoniae* with a  
435 bacteriophage cell wall hydrolase. Science 294: 2170-2172.

20. Loeffler JM, Fischetti VA (2003) Synergistic lethal effect of a combination of phage lytic enzymes with different activities on penicillin-sensitive and -resistant *Streptococcus pneumoniae* strains. *Antimicrob Agents Chemother* 47: 375-377.
21. Fischetti VA, Nelson D, Schuch R (2006) Reinventing phage therapy: are the parts greater than the sum? *Nat Biotechnol* 24: 1508-1511.
22. Grandgirard D, Loeffler JM, Fischetti VA, Leib SL (2008) Phage lytic enzyme Cpl-1 for antibacterial therapy in experimental pneumococcal meningitis. *J Infect Dis* 197: 1519-1522.
23. Daniel A, Euler C, Collin M, Chahales P, Gorelick KJ, et al. (2010) Synergism between a novel chimeric lysin and oxacillin protects against infection by methicillin-resistant *Staphylococcus aureus*. *Antimicrob Agents Chemother* 54: 1603-1612.
24. Pastagia M, Euler C, Chahales P, Fuentes-Duculan J, Krueger JG, et al. (2011) A novel chimeric lysin shows superiority to mupirocin for skin decolonization of methicillin-resistant and -sensitive *Staphylococcus aureus* strains. *Antimicrob Agents Chemother* 55: 738-744.
25. Djurkovic S, Loeffler JM, Fischetti VA (2005) Synergistic killing of *Streptococcus pneumoniae* with the bacteriophage lytic enzyme Cpl-1 and penicillin or gentamicin depends on the level of penicillin resistance. *Antimicrob Agents Chemother* 49: 1225-1228.
26. Jado I, Lopez R, Garcia E, Fenoll A, Casal J, et al. (2003) Phage lytic enzymes as therapy for antibiotic-resistant *Streptococcus pneumoniae* infection in a murine sepsis model. *J Antimicrob Chemother* 52: 967-973.
27. Cheng Q, Nelson D, Zhu S, Fischetti VA (2005) Removal of group B streptococci colonizing the vagina and oropharynx of mice with a bacteriophage lytic enzyme. *Antimicrob Agents Chemother* 49: 111-117.
28. Gutierrez D, Fernandez L, Rodriguez A, Garcia P (2018) Are Phage Lytic Proteins the Secret Weapon To Kill *Staphylococcus aureus*? *MBio* 9.

- 462 29. Catalao MJ, Gil F, Moniz-Pereira J, Sao-Jose C, Pimentel M (2013) Diversity in bacterial lysis  
463 systems: bacteriophages show the way. FEMS Microbiol Rev 37: 554-571.
- 464 30. Payne KM, Hatfull GF (2012) Mycobacteriophage endolysins: diverse and modular enzymes  
465 with multiple catalytic activities. PLoS One 7: e34052.
- 466 31. Hatfull GF (2012) Complete genome sequences of 138 mycobacteriophages. J Virol 86: 2382-  
467 2384.
- 468 32. Hatfull GF (2010) Mycobacteriophages: genes and genomes. Annu Rev Microbiol 64: 331-  
469 356.
- 470 33. Payne K, Sun Q, Sacchettini J, Hatfull GF (2009) Mycobacteriophage Lysin B is a novel  
471 mycolylarabinogalactan esterase. Mol Microbiol 73: 367-381.
- 472 34. Gil F, Catalao MJ, Moniz-Pereira J, Leandro P, McNeil M, et al. (2008) The lytic cassette of  
473 mycobacteriophage Ms6 encodes an enzyme with lipolytic activity. Microbiology 154:  
474 1364-1371.
- 475 35. Gil F, Grzegorzewicz AE, Catalao MJ, Vital J, McNeil MR, et al. (2010) Mycobacteriophage  
476 Ms6 LysB specifically targets the outer membrane of *Mycobacterium smegmatis*.  
477 Microbiology 156: 1497-1504.
- 478 36. Catalao MJ, Pimentel M (2018) Mycobacteriophage Lysis Enzymes: Targeting the  
479 Mycobacterial Cell Envelope. Viruses 10.
- 480 37. Lai MJ, Liu CC, Jiang SJ, Soo PC, Tu MH, et al. (2015) Antimycobacterial Activities of  
481 Endolysins Derived From a Mycobacteriophage, BTCU-1. Molecules 20: 19277-19290.
- 482 38. Gilham D, Lehner R (2005) Techniques to measure lipase and esterase activity *in vitro*.  
483 Methods 36: 139-147.



- 484 39. Schmelcher M, Powell AM, Becker SC, Camp MJ, Donovan DM (2012) Chimeric phage lysins  
485 act synergistically with lysostaphin to kill mastitis-causing *Staphylococcus aureus* in  
486 murine mammary glands. *Appl Environ Microbiol* 78: 2297-2305.
- 487 40. Mve-Obiang A, Lee RE, Portaels F, Small PL (2003) Heterogeneity of mycolactones produced  
488 by clinical isolates of *Mycobacterium ulcerans*: implications for virulence. *Infect Immun*  
489 71: 774-783.
- 490 41. Stinear TP, Hong H, Frigui W, Pryor MJ, Brosch R, et al. (2005) Common evolutionary origin  
491 for the unstable virulence plasmid pMUM found in geographically diverse strains of  
492 *Mycobacterium ulcerans*. *J Bacteriol* 187: 1668-1676.
- 493 42. Oliveira MS, Fraga AG, Torrado E, Castro AG, Pereira JP, et al. (2005) Infection with  
494 *Mycobacterium ulcerans* induces persistent inflammatory responses in mice. *Infect*  
495 *Immun* 73: 6299-6310.
- 496 43. Fraga AG, Cruz A, Martins TG, Torrado E, Saraiva M, et al. (2011) *Mycobacterium ulcerans*  
497 triggers T-cell immunity followed by local and regional but not systemic  
498 immunosuppression. *Infect Immun* 79: 421-430.
- 499 44. Martins TG, Gama JB, Fraga AG, Saraiva M, Silva MT, et al. (2012) Local and regional re-  
500 establishment of cellular immunity during curative antibiotherapy of murine  
501 *Mycobacterium ulcerans* infection. *PLoS One* 7: e32740.
- 502 45. Torrado E, Fraga AG, Logarinho E, Martins TG, Carmona JA, et al. (2010) IFN-gamma-  
503 dependent activation of macrophages during experimental infections by *Mycobacterium*  
504 *ulcerans* is impaired by the toxin mycolactone. *J Immunol* 184: 947-955.
- 505 46. Rodriguez L, Martinez B, Zhou Y, Rodriguez A, Donovan DM, et al. (2011) Lytic activity of the  
506 virion-associated peptidoglycan hydrolase HydH5 of *Staphylococcus aureus*  
507 bacteriophage vB\_SauS-phiPLA88. *BMC Microbiol* 11: 138.

47. O'Flaherty S, Coffey A, Meaney W, Fitzgerald GF, Ross RP (2005) The recombinant phage lysin LysK has a broad spectrum of lytic activity against clinically relevant staphylococci, including methicillin-resistant *Staphylococcus aureus*. J Bacteriol 187: 7161-7164.
48. Kikkawa HS, Ueda T, Suzuki S, Yasuda J (2008) Characterization of the catalytic activity of the gamma-phage lysin, PlyG, specific for *Bacillus anthracis*. FEMS Microbiol Lett 286: 236-240.
49. Schirmeier E, Zimmermann P, Hofmann V, Biebl M, Gerstmans H, et al. (2018) Inhibitory and bactericidal effect of Artilysin((R)) Art-175 against colistin-resistant mcr-1-positive *Escherichia coli* isolates. Int J Antimicrob Agents 51: 528-529.
50. Guenin-Mace L, Simeone R, Demangel C (2009) Lipids of pathogenic Mycobacteria: contributions to virulence and host immune suppression. Transbound Emerg Dis 56: 255-268.
51. Loeffler JM, Djurkovic S, Fischetti VA (2003) Phage lytic enzyme Cpl-1 as a novel antimicrobial for pneumococcal bacteremia. Infect Immun 71: 6199-6204.
52. Schmelcher M, Donovan DM, Loessner MJ (2012) Bacteriophage endolysins as novel antimicrobials. Future Microbiol 7: 1147-1171.
53. Fenton M, Ross P, McAuliffe O, O'Mahony J, Coffey A (2010) Recombinant bacteriophage lysins as antibacterials. Bioeng Bugs 1: 9-16.
54. Nelson D, Loomis L, Fischetti VA (2001) Prevention and elimination of upper respiratory colonization of mice by group A streptococci by using a bacteriophage lytic enzyme. Proc Natl Acad Sci U S A 98: 4107-4112.
